# Supplementary material
Source: Research Square preprint supplement (doi:10.21203/rs.3.rs-9733633/v1)
Supplement: Supplementary file 1 [file 2f0f1eb40b171b878cba2ca3.pdf]

# Supplementary Information for

## *Cross-Model Memorization Thresholds in Citation Generation: Evidence from Field-Level Cloze on Bibliographic Records*

Anonymous Author

The main text reports paper-cluster bootstrap 95% confidence intervals on per-(condition, field) inflection points and on paired condition–condition contrasts (Table 2 of the main paper and the corresponding subsection). This supplementary file provides a parametric complement: cluster-robust generalized estimating equations (GEE) for both the cross-condition comparison and the within-family reasoning effect. The conclusions track the bootstrap results in direction and significance; the GEE analysis adds the intercept-vs-slope decomposition that the bootstrap (which targets the inflection directly) does not separate.

### Specification

For each information-rich field (`title`, `first_author`, `co_authors`, `pages`) we fit a GEE logistic regression of binary recovery on  $\log_{10}(\text{cit}) \times C(\text{condition})$  with all seven conditions pooled into a single model, using a binomial family, the logit link, and an exchangeable working correlation structure clustered on the OpenAlex paper identifier (so each paper’s seven trials in that field share a working correlation). Sandwich (cluster-robust) standard errors are returned by construction. The omnibus joint Wald test on the  $C(\text{condition})$  regressors tests whether the seven baseline recovery levels differ; the omnibus on the  $\log_{10}(\text{cit}) \times C(\text{condition})$  regressors tests whether the seven citation–recovery slopes differ.

For the within-family reasoning effect we fit, separately for each of Gemini, GPT-5.4-mini, and DeepSeek, a GEE of the form

$$\text{score} \sim \log_{10}(\text{cit}) \times \text{thinking},$$

again clustered on paper id. The main effect of `thinking` is the intercept shift under reasoning, and the  $\log_{10}(\text{cit}) \times \text{thinking}$  interaction is the slope shift.

All fits use `statsmodels` defaults (`statsmodels.formula.api.gee`), binomial family, exchangeable correlation, and standard  $z$ -tests on the cluster-robust standard errors. The full numeric output is in `data/analysis/gee_results.json` in the project repository, and the fitting script in `scripts/gee_analysis.py`.

### Cross-condition omnibus tests (CS-AI)

### Per-family reasoning effects, per field (CS-AI)

Table 2 reports, for each model family and each information-rich field, the GEE coefficient on `thinking` (intercept shift) and on  $\log_{10}(\text{cit}) \times \text{thinking}$  (slope shift), with cluster-robust standard errors and  $p$ -values. The qualitative picture matches the per-field bootstrap contrasts in the main paper:

| field                     | Condition main effect |                       | $\log_{10}(\text{cit}) \times \text{condition}$ |                       |
|---------------------------|-----------------------|-----------------------|-------------------------------------------------|-----------------------|
|                           | $\chi^2(6)$           | $p$                   | $\chi^2(6)$                                     | $p$                   |
| <code>first_author</code> | 36.5                  | $2.2 \times 10^{-6}$  | 8.2                                             | 0.22                  |
| <code>title</code>        | 50.3                  | $4.1 \times 10^{-9}$  | 20.4                                            | $2.4 \times 10^{-3}$  |
| <code>co_authors</code>   | 72.0                  | $1.6 \times 10^{-13}$ | 31.8                                            | $1.8 \times 10^{-5}$  |
| <code>pages</code>        | 172.2                 | $1.5 \times 10^{-34}$ | 93.0                                            | $7.1 \times 10^{-18}$ |

Table 1: Joint Wald tests on the seven-condition GEE per field (cluster: `openalex_id`). The condition main effect is significant on every information-rich field. The  $\log_{10}(\text{cit}) \times \text{condition}$  slope interaction is significant on `title`, `co_authors`, and `pages` but not on `first_author`, meaning that on first author the seven recovery curves differ chiefly in their intercepts, not in their log-linear slopes—consistent with a shared scaling shape and model-specific shifts along the citation axis.

- **Gemini.** No per-field reasoning coefficient—intercept or slope—reaches the conventional  $p < 0.05$  threshold. The reasoning condition is statistically indistinguishable from the non-reasoning one on every information-rich field individually, the bootstrap-detected first-author shift of  $-0.09$  decades notwithstanding (the bootstrap pools the within-paper paired structure differently and is somewhat more sensitive to small shifts).
- **GPT-5.4-mini.** The strongest single coefficient is the `co_authors`  $\log_{10}(\text{cit}) \times \text{thinking}$  interaction ( $\beta = +0.52$ ,  $p = 0.002$ ): reasoning steepens the mini’s recovery curve on `co_authors`, which is exactly the field where the non-reasoning mini fares worst. The `title` interaction is marginal ( $\beta = +0.20$ ,  $p = 0.089$ ); on `pages` the main effect is marginal ( $\beta = +1.49$ ,  $p = 0.081$ ). The first-author shift is small and not significant at the field level—the mini’s first-author rescue is real (cf. the bootstrap contrast in the main paper) but modest relative to the field’s already-small gap.
- **DeepSeek.** The dominant effect is an adverse intercept shift on `title` ( $\beta = -0.96$ ,  $p = 1.0 \times 10^{-4}$ ) and `first_author` ( $\beta = -0.60$ ,  $p = 0.045$ ): reasoning lowers baseline recovery on the identifier fields. On `pages` the main effect is also adverse ( $\beta = -0.67$ ,  $p = 0.043$ ) but the slope steepens ( $\beta = +0.42$ ,  $p = 2.7 \times 10^{-4}$ ), producing the net improvement at high citation counts the main paper notes.

**Caveat on apparent disagreements with the bootstrap.** A few of the smaller bootstrap-detected effects (e.g. Gemini’s  $-0.09$ -decade first-author shift) do not reach  $p < 0.05$  in the GEE table above. This is expected: the paired-paper bootstrap and the single-coefficient GEE Wald test target different quantities. The bootstrap pairs each iteration’s paper resample across the two conditions and looks at  $\Delta \log_{10}(\text{inflection})$ , a single scalar derived from each paired fit; the GEE field test estimates a per-coefficient  $z$  on the regression scale within a joint model. For effects that are clearly larger than typical sampling noise (the mini’s reasoning rescue, DeepSeek’s title/first-author drop) both views agree; for borderline effects the bootstrap is slightly more sensitive because it uses the within-paper pairing directly.

## Cross-domain replication: Oncology per-tier accuracy and inflection points

The Oncology master (1,079 papers, `primary_topic.subfield.id = subfields/2730`) was run through the same seven conditions and analyzed with the same pipeline as CS-AI. Tables 3–4 are the direct Oncology counterparts of Tables 1 and 2 of the main paper. Aggregated comparisons

| family            | field        | thinking (intercept shift) |                      | $\log_{10}(\text{cit}) \times \text{thinking}$ (slope shift) |                      |
|-------------------|--------------|----------------------------|----------------------|--------------------------------------------------------------|----------------------|
|                   |              | $\beta$ (SE)               | $p$                  | $\beta$ (SE)                                                 | $p$                  |
| Gemini 3 Flash    | first_author | -0.08 (0.18)               | 0.65                 | +0.13 (0.08)                                                 | 0.12                 |
|                   | title        | -0.03 (0.19)               | 0.86                 | -0.00 (0.08)                                                 | 0.96                 |
|                   | co_authors   | +0.04 (0.17)               | 0.81                 | +0.09 (0.07)                                                 | 0.19                 |
|                   | pages        | +0.02 (0.16)               | 0.92                 | +0.08 (0.06)                                                 | 0.18                 |
| GPT-5.4-mini      | first_author | +0.09 (0.34)               | 0.80                 | +0.06 (0.12)                                                 | 0.60                 |
|                   | title        | +0.36 (0.32)               | 0.26                 | +0.20 (0.12)                                                 | 0.089                |
|                   | co_authors   | +0.47 (0.51)               | 0.35                 | +0.52 (0.17)                                                 | 0.0022               |
|                   | pages        | +1.49 (0.85)               | 0.081                | +0.24 (0.27)                                                 | 0.38                 |
| DeepSeek V4-Flash | first_author | -0.60 (0.30)               | 0.045                | -0.14 (0.13)                                                 | 0.25                 |
|                   | title        | -0.96 (0.25)               | $1.0 \times 10^{-4}$ | +0.25 (0.10)                                                 | $7.9 \times 10^{-3}$ |
|                   | co_authors   | +0.14 (0.27)               | 0.59                 | +0.03 (0.10)                                                 | 0.79                 |
|                   | pages        | -0.67 (0.33)               | 0.043                | +0.42 (0.12)                                                 | $2.7 \times 10^{-4}$ |

Table 2: Per-family reasoning GEE coefficients per field. “Intercept shift” is the main effect of **thinking** (the indicator for the reasoning-enabled condition within a family); “slope shift” is its interaction with  $\log_{10}(\text{cit})$ . Cluster-robust standard errors are in parentheses. Two-sided  $z$ -test  $p$ -values are shown. For each (family, field) pair the GEE pools the family’s two conditions (off/on) into one fit and clusters on `openalex_id`; each paper therefore contributes two trials to the model for that field.

(decade-scale contrasts and the *Cross-domain replication on Oncology* subsection in the main text) are derived from these per-condition values.

| field        | Gemini 3 Flash |     |      | GPT-5.4-mini |     |      | GPT-5.4 (full) |     |      | DeepSeek V4-Flash |     |      |
|--------------|----------------|-----|------|--------------|-----|------|----------------|-----|------|-------------------|-----|------|
|              | low            | mid | high | low          | mid | high | low            | mid | high | low               | mid | high |
| title        | 7              | 29  | 72   | 0            | 6   | 39   | 8              | 44  | 82   | 8                 | 39  | 82   |
| first_author | 17             | 53  | 88   | 1            | 10  | 50   | 6              | 35  | 75   | 21                | 63  | 87   |
| co_authors   | 1              | 7   | 15   | 0            | 0   | 1    | 0              | 2   | 12   | 2                 | 8   | 19   |
| year         | 83             | 81  | 89   | 74           | 78  | 89   | 82             | 80  | 89   | 83                | 80  | 89   |
| venue        | 78             | 92  | 96   | 36           | 54  | 64   | 54             | 75  | 67   | 72                | 90  | 97   |
| volume       | 85             | 92  | 99   | 58           | 64  | 74   | 74             | 79  | 92   | 78                | 82  | 91   |
| issue        | 88             | 97  | 97   | 23           | 21  | 22   | 46             | 55  | 78   | 71                | 70  | 78   |
| pages        | 31             | 68  | 84   | 2            | 3   | 14   | 15             | 58  | 86   | 19                | 45  | 77   |

Table 3: Per-field cloze recovery accuracy (%) on the Oncology master, for the four non-reasoning conditions, with the six half-decade strata collapsed into three coarse tiers (low: 10–100; mid: 101–1,000; high: > 1,000). Same conventions as Table 1 of the main paper. The field hierarchy (title/first-author memorize first, co-authors and pages later) and the GPT-5.4-mini outlier pattern both replicate; full-tier GPT-5.4 again sits with the other frontier flash-class models. Absolute accuracy levels are uniformly lower than the CS-AI counterparts, particularly on `co_authors` (where no condition exceeds 20% even at the high tier).

## Cross-domain replication: Oncology GEE results

The same per-field omnibus tests and per-family reasoning GEEs were fit on the Oncology master (released analysis output in `data/analysis/medicine_gee.json`).

| field               | Gemini 3 Flash                                        |                                                       | GPT-5.4-mini                                          |                                                        | GPT-5.4                                                | DeepSeek V4-Flash                                      |                                                        |
|---------------------|-------------------------------------------------------|-------------------------------------------------------|-------------------------------------------------------|--------------------------------------------------------|--------------------------------------------------------|--------------------------------------------------------|--------------------------------------------------------|
|                     | off                                                   | on                                                    | off                                                   | on                                                     | (full)                                                 | off                                                    | on                                                     |
| <b>first_author</b> | 218<br>[185, 254]                                     | 215<br>[182, 249]                                     | 2,519<br>[1,936, 3,364]                               | 6,312<br>[4,368, 9,720]                                | 597<br>[510, 722]                                      | 153<br>[128, 181]                                      | 1,719<br>[1,364, 2,226]                                |
| <b>title</b>        | 720<br>[604, 861]                                     | 793<br>[656, 974]                                     | 3,517<br>[2,766, 4,498]                               | 1,474<br>[1,256, 1,751]                                | 376<br>[321, 440]                                      | 418<br>[356, 493]                                      | 894<br>[762, 1,055]                                    |
| <b>co_authors</b>   | $4.1 \times 10^{4\dagger}$<br>[1.8, 16] $\times 10^4$ | $3.8 \times 10^{4\dagger}$<br>[1.8, 14] $\times 10^4$ | NA <sup>‡</sup><br>see footnote                       | $2.2 \times 10^{4\dagger}$<br>[1.3, 4.6] $\times 10^4$ | $2.3 \times 10^{4\dagger}$<br>[1.2, 6.1] $\times 10^4$ | $2.4 \times 10^{4\dagger}$<br>[1.2, 6.5] $\times 10^4$ | $2.2 \times 10^{4\dagger}$<br>[1.1, 5.5] $\times 10^4$ |
| <b>pages</b>        | 100<br>[80, 123]                                      | 103<br>[83, 127]                                      | $1.1 \times 10^{5\dagger}$<br>[0.3, 16] $\times 10^5$ | 706<br>[600, 833]                                      | 206<br>[175, 245]                                      | 341<br>[275, 427]                                      | 348<br>[288, 426]                                      |

Table 4: Citation count at which the logistic recovery probability crosses 0.5 on Oncology, per condition and field, with 95% paper-cluster bootstrap CIs ( $B = 1,000$ ). Same format as Table 2 of the main paper. <sup>†</sup>Point estimate sits above the 99th percentile of the Oncology citation distribution ( $\approx 17,000$ ), so it is an extrapolation of the fitted logistic, not an interpolation; this affects every condition on `co_authors` and GPT-5.4-mini’s non-reasoning `pages` fit, because the corresponding curves do not reach  $P = 0.5$  within the bulk of the data. <sup>‡</sup>The GPT-5.4-mini non-reasoning fit on `co_authors` did not converge on more than 26% of bootstrap resamples (262 of 1,000 iterations finite), so neither point estimate nor CI is reported; the CS-AI counterpart was already extrapolated, and on Oncology the curve is flatter still (cf. Table 3, high-tier accuracy 1%). The overall picture matches the main paper: GPT-5.4-mini is the non-reasoning outlier, the full-tier GPT-5.4 sits with the other frontier flash-class models, and Gemini’s reasoning shift is null while DeepSeek’s is adverse; the GPT-5.4-mini reasoning rescue helps `title/pages` but reverses on `first_author` in this domain.

| field               | Condition main effect |                       | $\log_{10}(\text{cit}) \times \text{condition}$ |                       |
|---------------------|-----------------------|-----------------------|-------------------------------------------------|-----------------------|
|                     | $\chi^2(6)$           | $p$                   | $\chi^2(6)$                                     | $p$                   |
| <b>first_author</b> | 56.8                  | $2.0 \times 10^{-10}$ | 6.9                                             | 0.33                  |
| <b>title</b>        | 40.1                  | $4.3 \times 10^{-7}$  | 19.3                                            | $3.7 \times 10^{-3}$  |
| <b>co_authors</b>   | 24.6                  | $4.0 \times 10^{-4}$  | 23.1                                            | $7.7 \times 10^{-4}$  |
| <b>pages</b>        | 111.5                 | $9.7 \times 10^{-22}$ | 66.9                                            | $1.8 \times 10^{-12}$ |

Table 5: Joint Wald tests on the seven-condition GEE per field on Oncology. The condition main effect is significant on every information-rich field, as on CS-AI. The slope interaction follows the same pattern as CS-AI: significant on `title`, `co_authors`, and `pages`, not on `first_author`—the seven first-author curves again differ in intercept only, supporting a single log-linear scaling shared across models with model-specific shifts on this field in both domains.

| family            | field                     | thinking (intercept shift) |                      | $\log_{10}(\text{cit}) \times \text{thinking}$ (slope shift) |                      |
|-------------------|---------------------------|----------------------------|----------------------|--------------------------------------------------------------|----------------------|
|                   |                           | $\beta$ (SE)               | $p$                  | $\beta$ (SE)                                                 | $p$                  |
| Gemini 3 Flash    | <code>first_author</code> | -0.39 (0.24)               | 0.094                | +0.18 (0.10)                                                 | 0.086                |
|                   | <code>title</code>        | +0.24 (0.34)               | 0.48                 | -0.11 (0.12)                                                 | 0.35                 |
|                   | <code>co_authors</code>   | +0.32 (0.43)               | 0.45                 | -0.06 (0.13)                                                 | 0.65                 |
|                   | <code>pages</code>        | -0.12 (0.13)               | 0.38                 | +0.05 (0.06)                                                 | 0.38                 |
| GPT-5.4-mini      | <code>first_author</code> | -0.09 (0.62)               | 0.89                 | -0.21 (0.21)                                                 | 0.31                 |
|                   | <code>title</code>        | +0.18 (0.66)               | 0.78                 | +0.27 (0.22)                                                 | 0.22                 |
|                   | <code>co_authors</code>   | -2.56 (1.54)               | 0.097                | +1.81 (0.59)                                                 | $2.3 \times 10^{-3}$ |
|                   | <code>pages</code>        | -1.38 (0.74)               | 0.063                | +1.42 (0.26)                                                 | $5.4 \times 10^{-8}$ |
| DeepSeek V4-Flash | <code>first_author</code> | -3.07 (0.52)               | $3.7 \times 10^{-9}$ | +0.32 (0.19)                                                 | 0.097                |
|                   | <code>title</code>        | -1.48 (0.44)               | $7.7 \times 10^{-4}$ | +0.24 (0.16)                                                 | 0.14                 |
|                   | <code>co_authors</code>   | +0.17 (0.52)               | 0.74                 | -0.02 (0.16)                                                 | 0.90                 |
|                   | <code>pages</code>        | -0.43 (0.25)               | 0.088                | +0.16 (0.10)                                                 | 0.089                |

Table 6: Per-family reasoning GEE coefficients on Oncology, in the same format as Table 2. Three patterns differ qualitatively from CS-AI. (i) For GPT-5.4-mini the slope-shift interaction on `pages` is now extremely significant ( $\beta = +1.42$ ,  $p = 5 \times 10^{-8}$ , against an essentially-null  $+0.24$  on CS-AI), confirming the pages reasoning rescue at very high  $z$ ; the `co_authors` interaction is also stronger ( $+1.81$  vs.  $+0.52$ ). (ii) On `first_author` the GPT-5.4-mini slope-shift sign is now negative ( $-0.21$ ,  $p = 0.31$ ), consistent with the bootstrap-detected reversal of the first-author reasoning rescue noted in the main paper. (iii) DeepSeek’s adverse intercept shift on `first_author` is much larger on Oncology ( $\beta = -3.07$ ,  $p = 4 \times 10^{-9}$ , against  $-0.60$ ,  $p = 0.045$  on CS-AI), and the same shift on `title` is also larger ( $-1.48$  vs.  $-0.96$ ): in a domain where the identifier is less likely to be memorized, the reasoning-induced displacement of verbatim recall has more room to harm.
